# Supplementary material
Source: MDPI journal article supplement (https://www.mdpi.com/1996-1073/15/14/4954)
Supplement: s1 [file s1]

---

## Supplementary data

**Table S1.** Fermentation capacity test of thermotolerant yeast isolates on YPD broth containing Durham tubes and 31.56 g/L ethanol.

| Isolates | Accumulation of CO <sub>2</sub> gas in Durham tubes |
|----------|-----------------------------------------------------|
| YSR1     | +                                                   |
| YSR7     | +                                                   |
| YSR9     | +                                                   |
| YSR12    | +                                                   |
| YSR15    | +                                                   |
| YSR20    | +                                                   |
| YSR23    | +                                                   |
| YSR25    | +                                                   |
| YSR29    | +                                                   |
| YSR32    | +                                                   |
| YRB1     | +                                                   |
| YRB4     | +                                                   |
| YRB7     | +                                                   |
| YRB8     | +                                                   |
| YLB2     | +                                                   |
| YLB4     | +                                                   |
| YLB6     | +                                                   |
| YSM3     | +                                                   |

(+) : accumulation
